# Supplementary material for: Antifungal Activity of Cedrol from Cunninghamia lanceolate var. konishii against Phellinus noxius and Its Mechanism
Source: MDPI journal article supplement (doi:10.3390/plants13020321), 2024-01-21
Supplement: s1 [file s1]

Supporting Information

# **Antifungal Activity of Cedrol from *Cunninghamia lanceolate* var. *konishii* against *Phellinus noxius* and Its Mechanism**

Wen-Wei Hsiao <sup>1</sup>, Ka-Man Lau <sup>2</sup>, Shih-Chang Chien <sup>3</sup>, Fang-Hua Chu <sup>4</sup>, Wen-Hsin Chung <sup>5</sup>  
and Sheng-Yang Wang <sup>2,6,7,\*</sup>

<sup>1</sup> Experimental Forest, College of Bio-Resources and Agriculture, National Taiwan University, Taipei 10617, Taiwan; hsiaoww@gmail.com

<sup>2</sup> Department of Forestry, National Chung Hsing University, Taichung 40202, Taiwan; kakablauu@gmail.com

<sup>3</sup> Experimental Forest Management Office, National Chung Hsing University, Taichung 40202, Taiwan; scchien@dragon.nchu.edu.tw

<sup>4</sup> School of Forestry and Resource Conservation, National Taiwan University, Taipei 106217, Taiwan; fhchu@ntu.edu.tw

<sup>5</sup> Department of Plant Pathology, National Chung Hsing University, Taichung 40202, Taiwan; wenchung@nchu.edu.tw

<sup>6</sup> Special Crop and Metabolome Discipline Cluster, Academy Circle Economy, National Chung Hsing University, Taichung 40202, Taiwan

<sup>7</sup> Agricultural Biotechnology Research Center, Academia Sinica, Taipei 11529, Taiwan

\* Correspondence: taiwanfir@dragon.nchu.edu.tw; Tel.: +886-422850333; Fax: +886-422862960

Table S1. SDS-PAGE formula.

| Chemical components     | Separating gel |      |      |      | Stacking gel |
|-------------------------|----------------|------|------|------|--------------|
|                         | 8%             | 10%  | 12%  | 15%  |              |
| ddH <sub>2</sub> O      | 4600           | 4000 | 3300 | 2300 | 1700         |
| 1.5M Tris-HCl           | 2500           | 2500 | 2500 | 2500 | -            |
| 0.5M Tris-HCl           | -              | -    | -    | -    | 750          |
| 30% Acrylamide/Bis      | 2700           | 3300 | 4000 | 5000 | 500          |
| 10% SDS                 | 100            | 100  | 100  | 100  | 30           |
| 10% Ammonium persulfate | 100            | 100  | 100  | 100  | 30           |
| TEMED                   | 6              | 4    | 4    | 4    | 3            |

Unit:  $\mu$ L, microliter

Table S2. Antibody products list.

| Antibodies   | Manufacturers             | #        |
|--------------|---------------------------|----------|
| GAPDH        | Arigo Biolaboratories     | ARG62345 |
| Cytochrome c | Cell Signaling Technology | 11940    |
| Caspase-9    | Cell Signaling Technology | 9502     |
| Caspase-3    | Cell Signaling Technology | 9662     |
| PARP         | Cell Signaling Technology | 9542     |
| Apaf-1       | Cell Signaling Technology | 8969     |
| AIF          | Cell Signaling Technology | 4642     |
